# Supplementary material for: Effectiveness of the Influence of Selected Essential Oils on the Growth of Parasitic Fusarium Isolated from Wheat Kernels from Central Europe
Source: MDPI journal article supplement (doi:10.3390/molecules26216488), 2021-10-27
Supplement: s1 [file s1]

Supplementary materials

Table S1 Minimum of growth rate index of the analyzed oil at minimum concentration of the each considered isolates of Fusarium

| Oil           | Isolate | Concentration | N | Mean   | SD.   | Isolate | Concentration | N | Mean   | SD.   | Isolate | Concentration | N | Mean   | SD.   |
|---------------|---------|---------------|---|--------|-------|---------|---------------|---|--------|-------|---------|---------------|---|--------|-------|
| grapefruit    | FAPL    | 2.000         | 4 | 41.275 | 0.596 | FCPL    | 2.000         | 4 | 14.133 | 4.414 | FC1D    | 2.000         | 4 | 24.813 | 2.275 |
| cajeput       |         | 1.000         | 4 | 0.000  | 0.000 |         | 0.500         | 4 | 0.000  | 0.000 |         | 0.500         | 4 | 0.000  | 0.000 |
| lemongrass    |         | 0.125         | 4 | 0.000  | 0.000 |         | 0.050         | 4 | 0.000  | 0.000 |         | 0.025         | 4 | 0.000  | 0.000 |
| Litsea cubeba |         | 0.125         | 4 | 0.000  | 0.000 |         | 0.050         | 4 | 0.000  | 0.000 |         | 0.025         | 4 | 0.000  | 0.000 |
| thyme         |         | 0.025         | 4 | 0.000  | 0.000 |         | 0.025         | 4 | 0.000  | 0.000 |         | 0.025         | 4 | 0.000  | 0.000 |
| tea tree      |         | 0.500         | 4 | 0.000  | 0.000 |         | 0.500         | 4 | 0.000  | 0.000 |         | 0.500         | 4 | 0.000  | 0.000 |
| verbena       |         | 0.125         | 4 | 0.000  | 0.000 |         | 0.125         | 4 | 0.000  | 0.000 |         | 0.050         | 4 | 0.000  | 0.000 |
| Funaben T     |         | 0.125         | 4 | 0.000  | 0.000 |         | 0.125         | 4 | 0.000  | 0.000 |         | 0.125         | 4 | 0.000  | 0.000 |
| Control       |         |               | 4 | 48.033 | 0.089 |         |               | 4 | 49.828 | 0.328 |         |               | 4 | 50.023 | 0.109 |
| grapefruit    | FC2D    | 2.000         | 4 | 29.738 | 1.437 | FGPL    | 2.000         | 4 | 34.734 | 3.967 | FG1D    | 2.000         | 4 | 16.944 | 1.894 |
| cajeput       |         | 0.500         | 4 | 0.000  | 0.000 |         | 0.500         | 3 | 0.000  | 0.000 |         | 0.500         | 4 | 0.000  | 0.000 |
| lemongrass    |         | 0.050         | 4 | 0.000  | 0.000 |         | 0.050         | 4 | 0.000  | 0.000 |         | 0.050         | 4 | 0.000  | 0.000 |
| Litsea cubeba |         | 0.050         | 4 | 0.000  | 0.000 |         | 0.050         | 4 | 0.000  | 0.000 |         | 0.050         | 4 | 0.000  | 0.000 |
| thyme         |         | 0.025         | 4 | 0.000  | 0.000 |         | 0.025         | 4 | 0.000  | 0.000 |         | 0.025         | 4 | 0.000  | 0.000 |
| tea tree      |         | 0.250         | 4 | 0.000  | 0.000 |         | 0.025         | 4 | 39.492 | 5.226 |         | 0.250         | 4 | 0.000  | 0.000 |
| verbena       |         | 0.125         | 4 | 0.000  | 0.000 |         | 0.125         | 4 | 0.000  | 0.000 |         | 0.125         | 4 | 0.000  | 0.000 |
| Funaben T     |         | 0.125         | 4 | 0.000  | 0.000 |         | 0.125         | 4 | 0.000  | 0.000 |         | 0.125         | 4 | 0.000  | 0.000 |
| Control       |         |               | 4 | 49.184 | 0.131 |         |               | 4 | 49.863 | 0.187 |         |               | 4 | 51.722 | 0.082 |
| grapefruit    | FG2D    | 2.000         | 4 | 18.016 | 0.491 | FOPL    | 2.000         | 4 | 29.233 | 1.252 | FP0D    | 2.000         | 4 | 20.547 | 0.172 |
| cajeput       |         | 0.500         | 4 | 0.000  | 0.000 |         | 1.000         | 4 | 0.000  | 0.000 |         | 0.500         | 4 | 0.000  | 0.000 |
| lemongrass    |         | 0.050         | 4 | 0.000  | 0.000 |         | 0.125         | 4 | 0.000  | 0.000 |         | 0.050         | 4 | 0.000  | 0.000 |
| Litsea cubeba |         | 0.050         | 4 | 0.000  | 0.000 |         | 0.125         | 4 | 0.000  | 0.000 |         | 0.050         | 4 | 0.000  | 0.000 |
| thyme         |         | 0.025         | 4 | 0.000  | 0.000 |         | 0.125         | 4 | 0.000  | 0.000 |         | 0.025         | 4 | 0.000  | 0.000 |
| tea tree      |         | 0.250         | 4 | 0.000  | 0.000 |         | 0.500         | 4 | 0.000  | 0.000 |         | 0.250         | 4 | 0.000  | 0.000 |
| verbena       |         | 0.050         | 4 | 0.000  | 0.000 |         | 0.125         | 4 | 0.000  | 0.000 |         | 0.125         | 4 | 0.000  | 0.000 |
| Funaben T     |         | 0.125         | 4 | 0.000  | 0.000 |         | 0.125         | 4 | 0.000  | 0.000 |         | 0.125         | 4 | 0.000  | 0.000 |
| Control       |         |               | 4 | 49.148 | 0.402 |         |               | 4 | 46.390 | 3.414 |         |               | 4 | 49.934 | 0.068 |
